# Supplementary material for: Copper substituted P2-type Na0.67CuxMn1−xO2: a stable high-power sodium-ion battery cathode
Source: Royal Society of Chemistry journal article supplement (doi:10.1039/c5ta06371j), 2015-01-01
Supplement: c5ta06371j1.pdf [file c5ta06371j1.pdf]

Supporting Information

**Copper substituted P2-type  $\text{Na}_{0.67}\text{Cu}_x\text{Mn}_{1-x}\text{O}_2$ : a stable high-power sodium-ion battery cathode**

Wenpei Kang<sup>a,b</sup>, Zhenyu Zhang<sup>a,b</sup>, Pui-Kit Lee,<sup>c</sup> Tsz-Wai Ng<sup>a,b</sup>, Wenyue Li<sup>a,d</sup>,  
Yongbing Tang<sup>a,d</sup>, Wenjun Zhang<sup>a,b</sup>, Chun-Sing Lee<sup>a,b\*</sup> and Denis Yau Wai Yu<sup>a,c\*</sup>

a Center of Super-Diamond and Advanced Films (COSDAF), City University of Hong Kong, Hong Kong SAR, People's Republic of China.

b Department of Physics and Materials Science, City University of Hong Kong, Hong Kong SAR, People's Republic of China.

c School of Energy and Environment, City University of Hong Kong, Hong Kong SAR, People's Republic of China.

d Functional Thin Films Research Center, Shenzhen Institutes of Advanced Technology, Chinese Academy of Sciences, People's Republic of China.

E-mail: [denisyu@cityu.edu.hk](mailto:denisyu@cityu.edu.hk); [apcslee@cityu.edu.hk](mailto:apcslee@cityu.edu.hk); Tel: +852-34426885

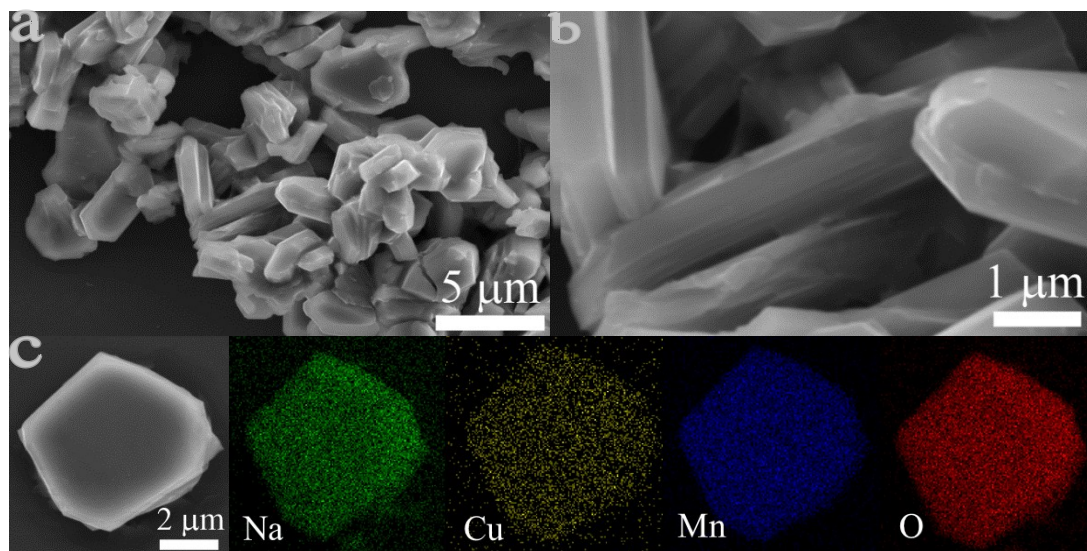

Fig. S1 (a, b) SEM images, (c) EDX mapping images of  $\text{Na}_{0.67}\text{Cu}_{0.25}\text{Mn}_{0.75}\text{O}_2$ .

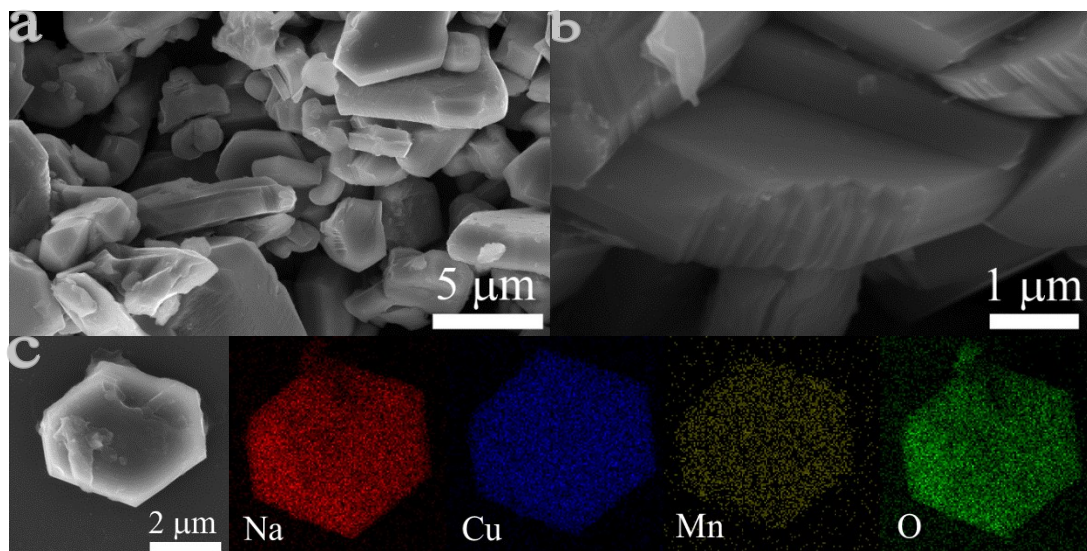

Fig.S2 (a, b) SEM images, (c) EDX mapping images of  $\text{Na}_{0.67}\text{Cu}_{0.33}\text{Mn}_{0.67}\text{O}_2$ .

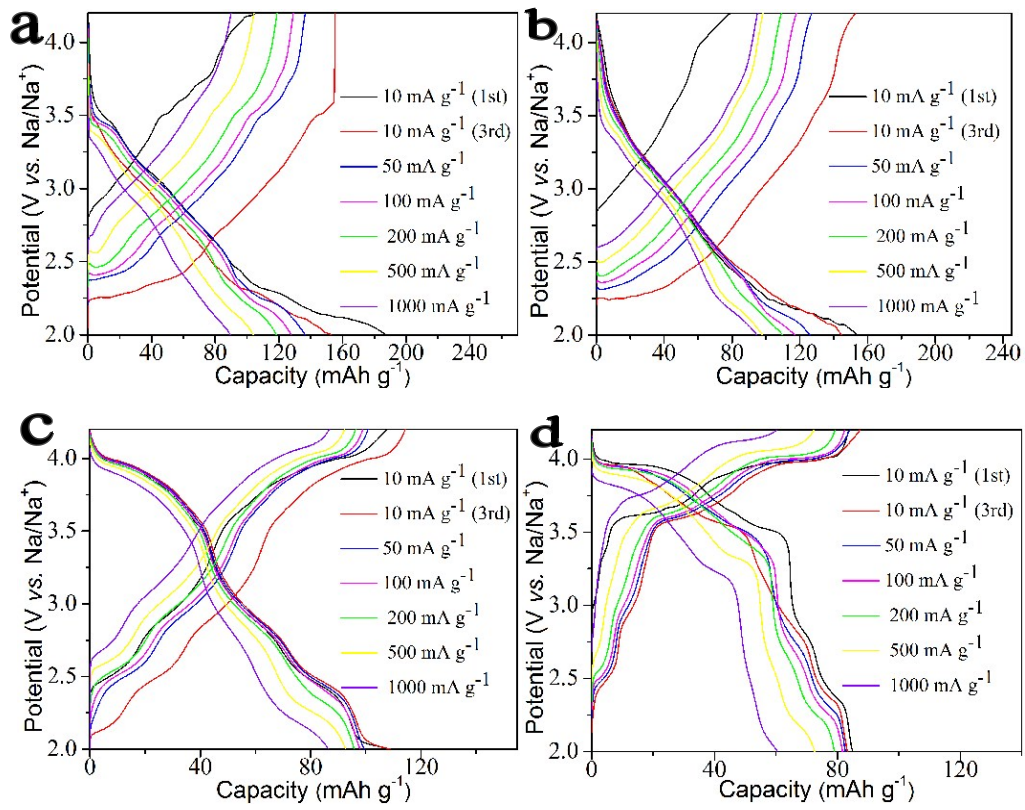

Fig. S3 Representative charge–discharge curves of the electrode at different current density with various  $\text{Na}_{0.67}\text{Cu}_x\text{Mn}_{1-x}\text{O}_2$  samples: (a)  $x = 0$ , (b)  $x = 0.14$ , (c)  $x = 0.25$  and (d)  $x = 0.33$ .

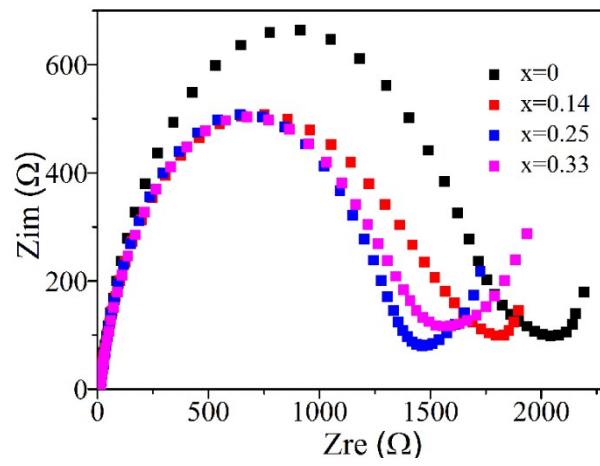

Fig.S4 Nyquist plots in the range of 100 kHz to 10 mHz of the  $\text{Na}_{0.67}\text{Cu}_x\text{Mn}_{1-x}\text{O}_2$  electrode in a fresh cell.

Tab. S1 Results of Na-Mn-O based cathode materials found in the literature

| Material                                                                                    | Initial capacity<br>(mAh g <sup>-1</sup> ) | Test current<br>(mA g <sup>-1</sup> ) | Capacity  | capacity<br>retention | Ref |
|---------------------------------------------------------------------------------------------|--------------------------------------------|---------------------------------------|-----------|-----------------------|-----|
| Na <sub>x</sub> MnO <sub>2+z</sub>                                                          | 140                                        | 200                                   | 84/100th  | 60%                   | 25  |
| Na <sub>0.7</sub> MnO <sub>2</sub>                                                          | 125                                        | 180                                   | ~70/50th  | 56%                   | 26  |
| Na <sub>2/3</sub> Co <sub>1/2</sub> Mn <sub>1/2</sub> O <sub>2</sub>                        | 123                                        | 30                                    | 85/30th   | 69%                   | 27  |
| Na <sub>2/3</sub> Ni <sub>1/3</sub> Mn <sub>2/3</sub> O <sub>2</sub>                        | 150                                        | 10                                    | 104/30th  | 69%                   | 28  |
| Na <sub>2/3</sub> Fe <sub>1/3</sub> Mn <sub>2/3</sub> O <sub>2</sub>                        | 191                                        | 12                                    | 153/40th  | 80%                   | 29  |
| Na <sub>x</sub> Fe <sub>1/2</sub> Mn <sub>1/2</sub> O <sub>2</sub>                          | 185                                        | 6                                     | ~120/50th | 65%                   | 30  |
| Na <sub>2/3</sub> Fe <sub>1/2</sub> Mn <sub>1/2</sub> O <sub>2</sub>                        | 190                                        | 12                                    | ~150/30th | 79%                   | 31  |
| Na <sub>2/3</sub> Fe <sub>1/2</sub> Mn <sub>1/2</sub> O <sub>2</sub> @Graphene              | 91                                         | 12                                    | 60/140th  | 66%                   | 32  |
| Na <sub>0.67</sub> Mg <sub>0.1</sub> Mn <sub>0.9</sub> O <sub>2</sub>                       | 170                                        | 12                                    | ~130/25th | 76%                   | 33  |
| Na <sub>2/3</sub> [Mg <sub>0.28</sub> Mn <sub>0.72</sub> ]O <sub>2</sub>                    | 210                                        | 10                                    | ~150/30th | 71%                   | 34  |
| Na <sub>0.68</sub> Cu <sub>0.34</sub> Mn <sub>0.66</sub> O <sub>2</sub>                     | 70                                         | ~20                                   | 43/1000th | 61%                   | 35  |
| Na <sub>0.5</sub> [Ni <sub>0.23</sub> Fe <sub>0.13</sub> Mn <sub>0.63</sub> ]O <sub>2</sub> | 175                                        | 100                                   | 120/100th | 69%                   | 36  |
| NaNi <sub>1/3</sub> Fe <sub>1/3</sub> Mn <sub>1/3</sub> O <sub>2</sub>                      | 120                                        | 75                                    | 100/150th | 83%                   | 37  |
| Na <sub>0.67</sub> [Ni <sub>0.15</sub> Co <sub>0.2</sub> Mn <sub>0.65</sub> ]O <sub>2</sub> | 141                                        | 20                                    | 123/50th  | 87%                   | 38  |
| Na <sub>2/3</sub> Ni <sub>1/9</sub> Co <sub>2/3</sub> Mn <sub>2/9</sub> O <sub>2</sub>      | 110                                        | 12.6                                  | ~100/90th | 91%                   | 39  |
| Na <sub>x</sub> Ni <sub>0.22</sub> Co <sub>0.11</sub> Mn <sub>0.66</sub> O <sub>2</sub>     | 130                                        | 12                                    | ~99/200th | 76%                   | 40  |
